# Supplementary figures and images for: Safety of Algal Oil Containing EPA and DHA in cats during gestation, lactation and growth
Source: PubMed Central journal article supplement — J Anim Physiol Anim Nutr (Berl). 2020 Feb 18;104(5):1509–23. doi: 10.1111/jpn.13324 (PMC7540550; doi:10.1111/jpn.13324), 2020-02-18

### Queens: ARA

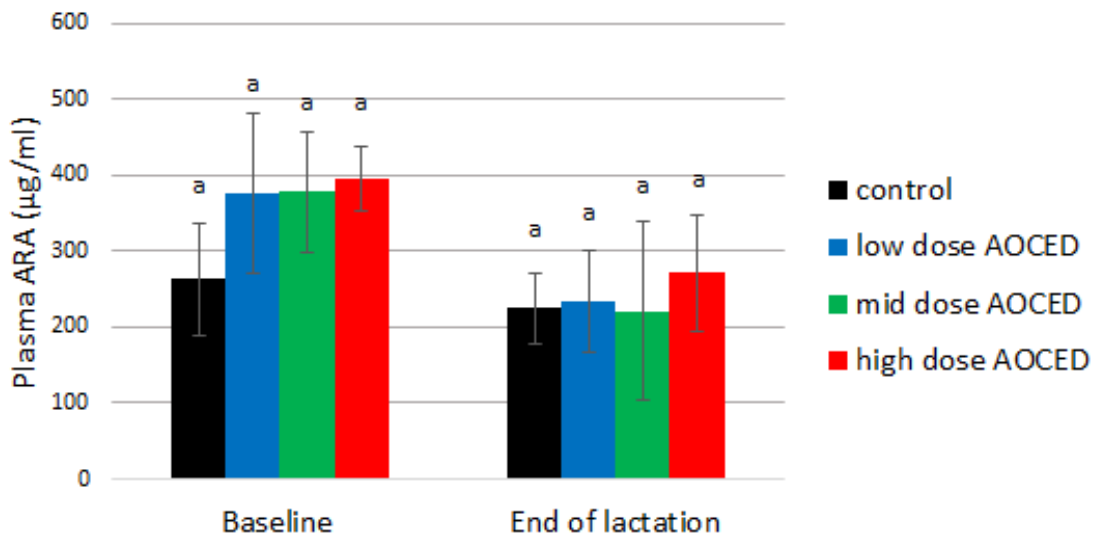

Supplement: JPN-104-1509-s001.pdf [file JPN-104-1509-s001.pdf]

### Kittens, combined sexes, ARA

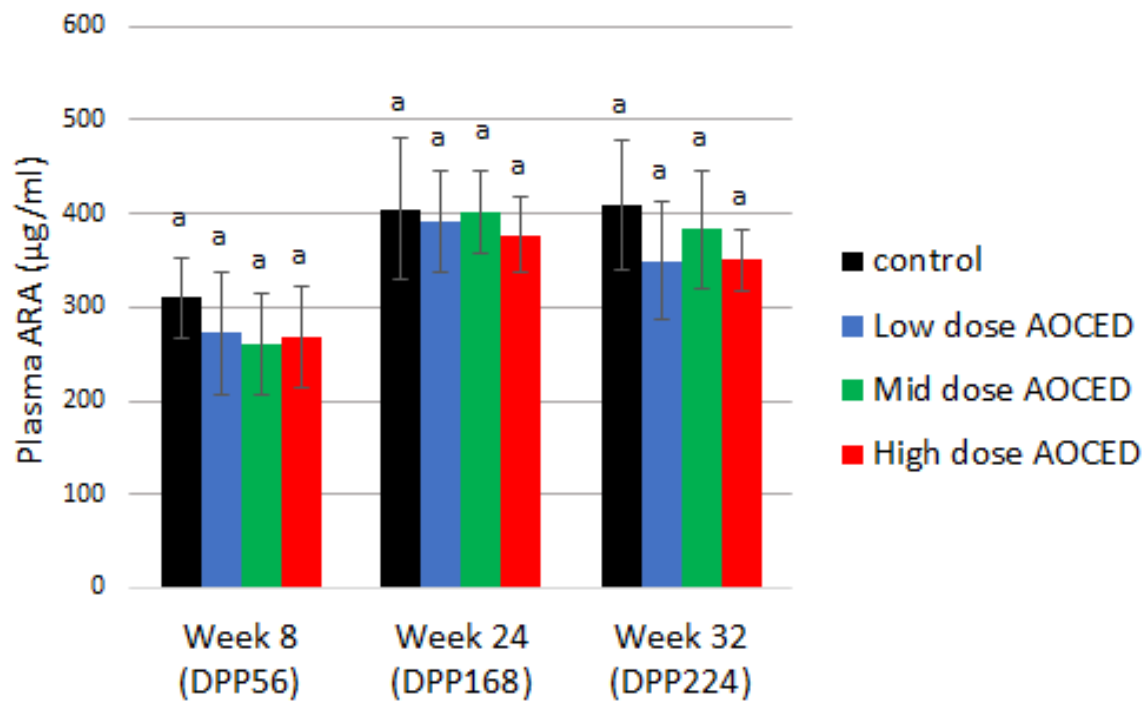

Supplement: JPN-104-1509-s002.pdf [file JPN-104-1509-s002.pdf]
